# Supplementary material for: RNA Nanotherapeutics for the Amelioration of Astroglial Reactivity
Source: PubMed Central journal article supplement (PMC5738063; doi:10.1016/j.omtn.2017.11.008), 2017-11-24
Supplement: mmc1.pdf [file mmc1.pdf]

**OMTN, Volume 10**

## **Supplemental Information**

### **RNA Nanotherapeutics for the Amelioration of Astroglial Reactivity**

**Jayden A. Smith, Alice Braga, Jeroen Verheyen, Silvia Basilico, Sara Bandiera, Clara Al-faro-Cervello, Luca Peruzzotti-Jametti, Dan Shu, Farzin Haque, Peixuan Guo, and Stefano Pluchino**

## Supplemental Information

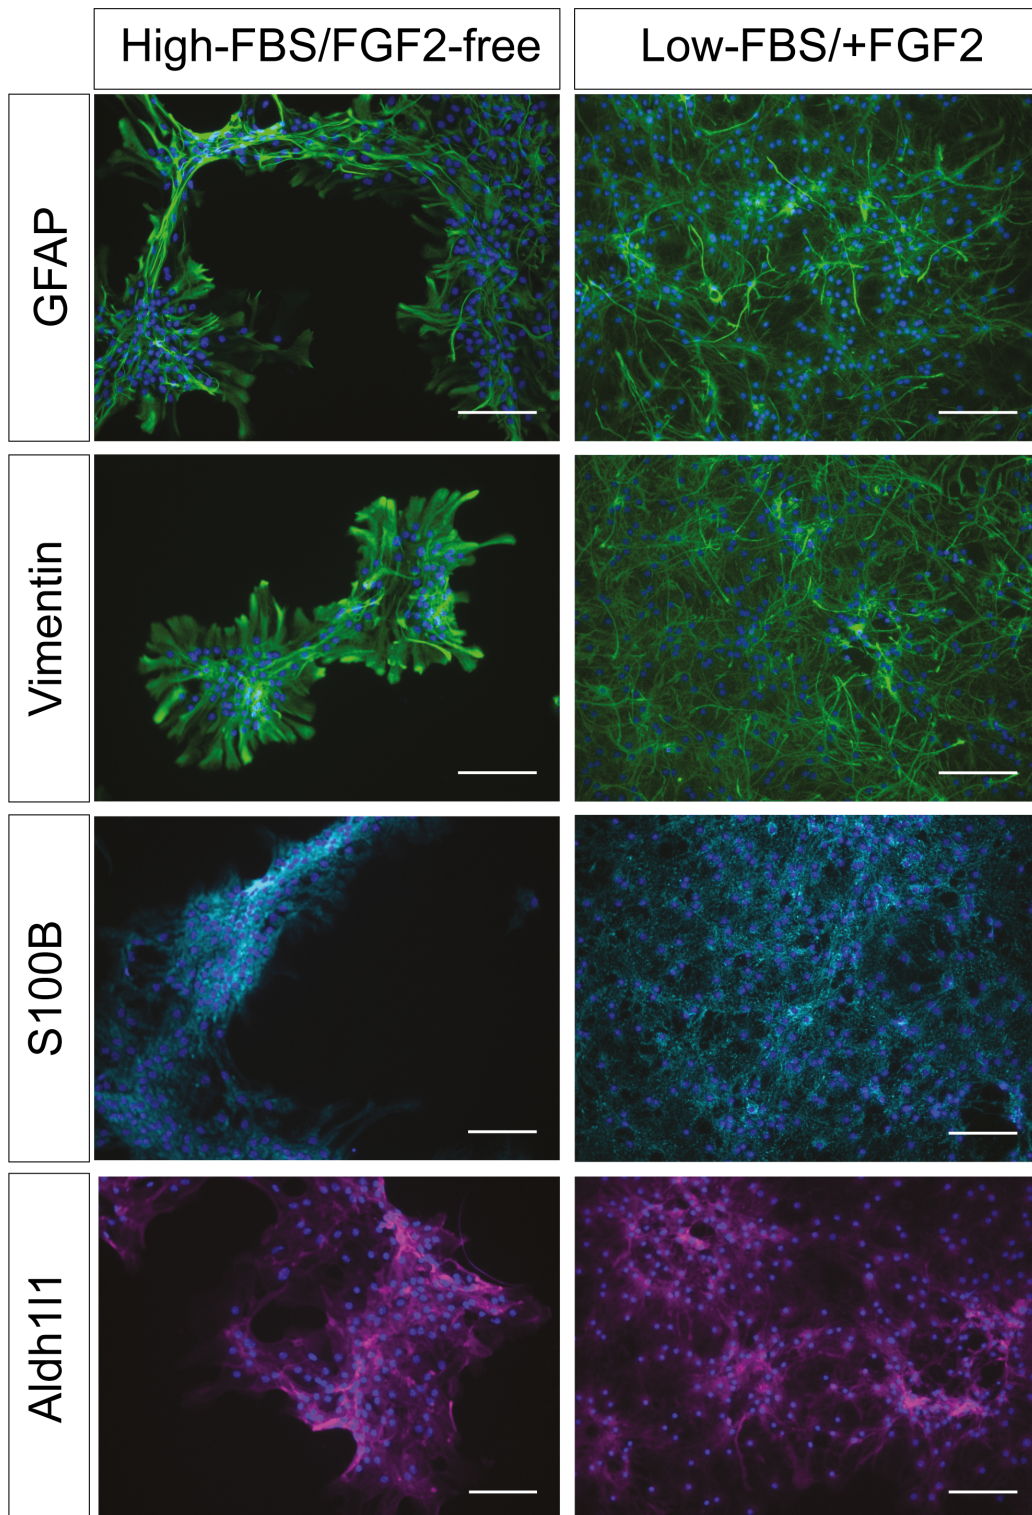

**Figure S1. Immunofluorescence characterisation of high-FBS/FGF2-free versus low-FBS/+FGF2 cultured astrocytes.** From top-to-bottom, comparative morphology and expression of astroglial markers GFAP, Vimentin, S100B, and Aldh111 in high-FBS/FGF2-free (left column) and low-FBS/+FGF2 (right column) cultured astrocytes. Nuclei counterstained with DAPI (blue). Scale bar = 100  $\mu$ m.

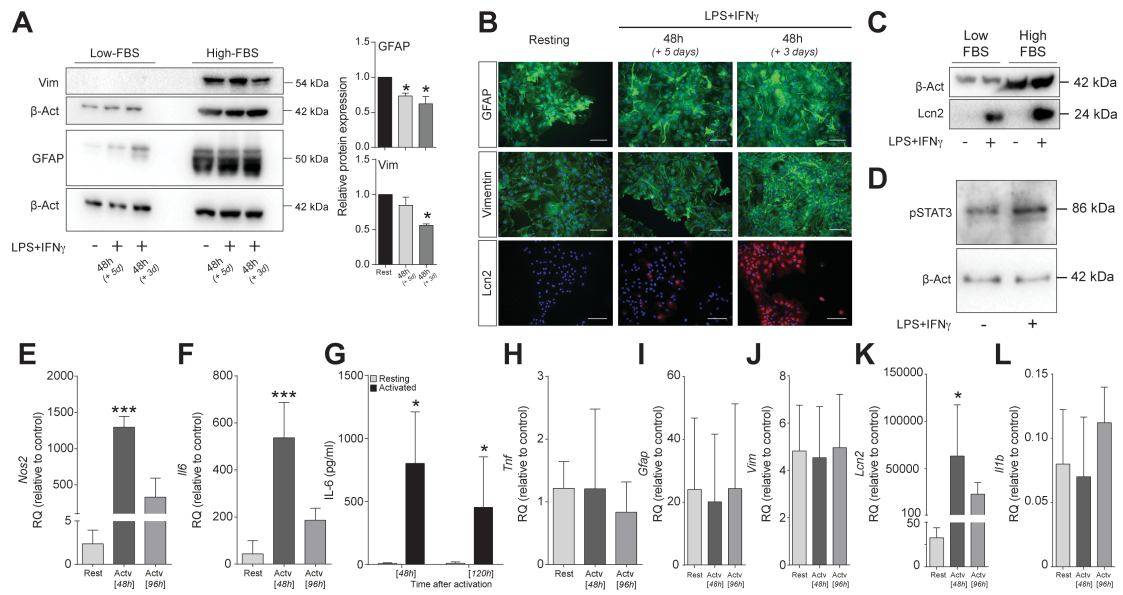

**Figure S2. Response of high-FBS/FGF2-free cultured astrocytes to LPS+IFN $\gamma$  stimulation.** (A) Representative Western blots showing GFAP and Vim protein expression levels 3 and 5 days after a 48h activation period, as compared to comparative conditions in low-FBS astrocytes. Densitometric quantification of GFAP and Vim Western blot expression relative to  $\beta$ -actin, normalised to resting conditions, is depicted alongside. (B) Immunofluorescence micrographs of resting and activated high-FBS/FGF2-free astrocytes showing expression of GFAP, Vim and Lcn2. Activated astrocytes imaged 3 and 5 days after a 48h activation period (GFAP/Vim: green, DAPI-stained nuclei: blue). (C) Representative Western blot showing expression of Lcn2 (23 kDa) upon 24h of LPS+IFN $\gamma$  exposure, in low- and high-FBS conditions. (D) pSTAT3 (Tyr705) in resting and activated (1h LPS+IFN $\gamma$  stimulation) high-FBS/FGF2-free astrocytes. (E, F and H-K): qPCR quantification of (E) *Nos2*, (F) *Ilf6*, and (H) *Tnf*, (H) *Ilf6*, (I) *Gfap*, (J) *Vim*, (K) *Lcn2*, and (L) *Ilf1b* levels in resting and LPS+IFN $\gamma$ -treated high-FBS astrocytes (48 and 96 hours after activation). Expression relative to resting low-FBS/+FGF2 controls ( $2^{-\Delta\Delta Ct}$  method), *Gapdh* reference gene. (G) Secreted IL-6 as measured by ELISA, resting vs. activated conditions, at 48h and 120h post-stimulation. All data expressed as the mean of  $\geq 3$  biological replicates  $\pm$  SD; \*  $p \leq 0.05$ , \*\*  $p \leq 0.01$ , \*\*\*  $p \leq 0.001$ , or \*\*\*\*  $p \leq 0.0001$  relative to non-activated control samples (qPCR and Western blot: one-way ANOVA with Dunnett's multiple comparison test; ELISA: multiple t-tests with statistical significance determined using the Holm-Sidak method,  $\alpha = 0.05$ ).

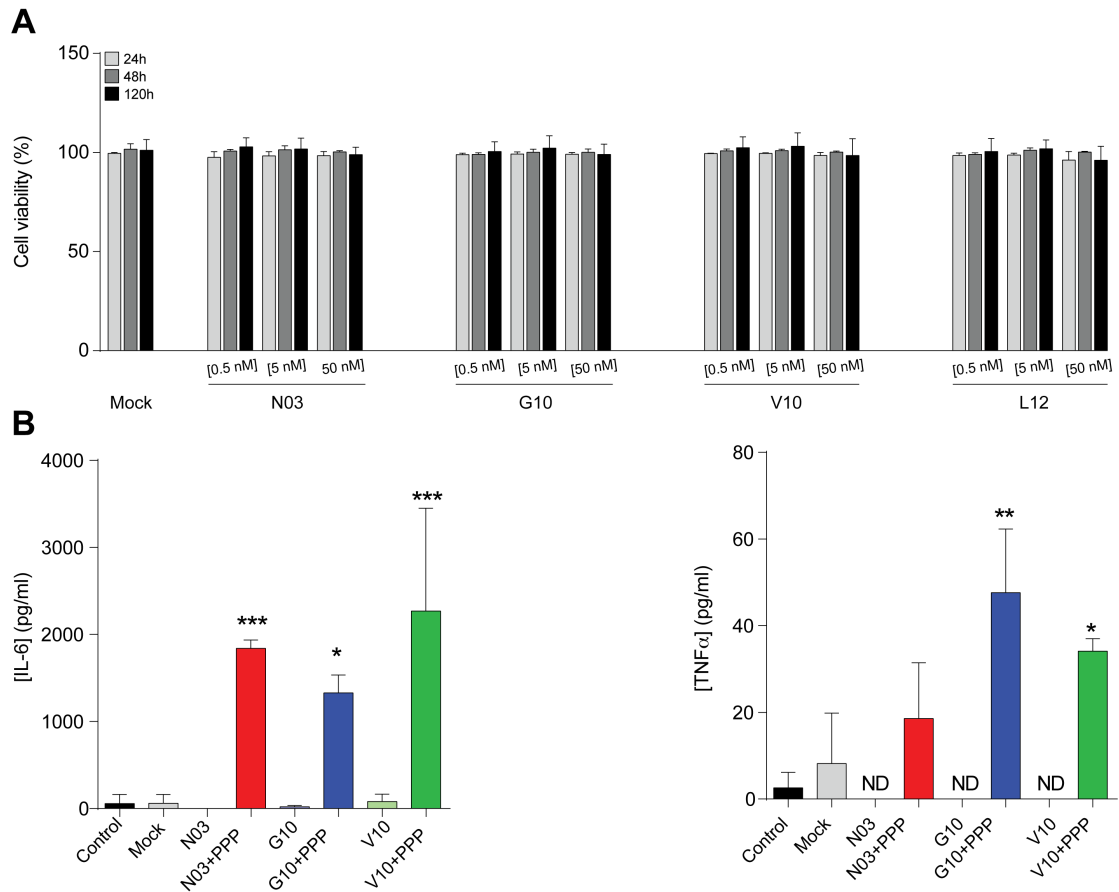

**Figure S3. Dephosphorylated siRNA-3WJ nanostructures do not induce pro-inflammatory secretions and are non-toxic.** (A) LDH cytotoxicity assay comparing the effect of 0.5, 5, and 50 nM doses of the siRNA-3WJ nanostructures employed in this study in low-FBS astrocytes. Supernatant LDH levels were determined colorimetrically at 24h, 48h and 120h after transfection, with a calibration establishing non-treated cells as 100% viable, lysed cells as 0% viable. N = 3 biological replicates,  $\pm$  SD, with no statistically significant differences between treatments. (B) Quantification of IL-6 and TNF- $\alpha$  concentrations (pg/ml) in the supernatant of astrocytes treated with 3WJs with (+PPP) or without 5'-triphosphate groups. Results expressed as the mean cytokine concentration measured from  $n \geq 2$  biological replicates  $\pm$  SD; \*  $p \leq 0.05$ , \*\*  $p \leq 0.01$ , \*\*\*  $p \leq 0.001$ , or \*\*\*\*  $p \leq 0.0001$  relative to untreated control samples (one-way ANOVA with Dunnett's multiple comparison test); ND = Not Determined.

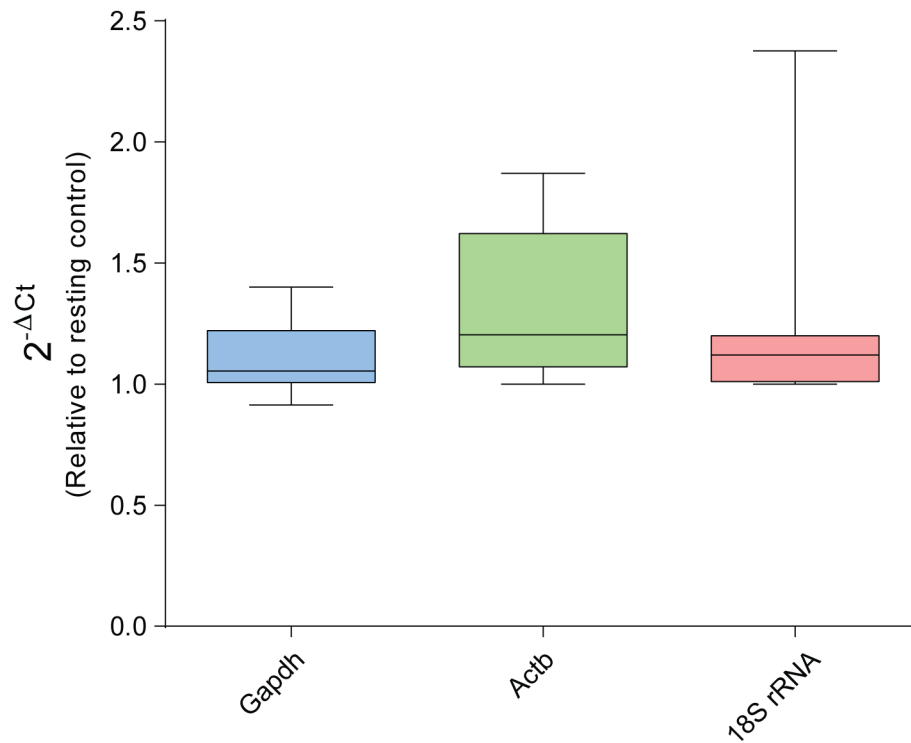

**Figure S4. Reference gene expression remains stable across treatment and activation conditions.** The stability of the putative genes of reference *Gapdh*, *Actb*, and *RNa18s5* were assayed across control, mock and N03-3WJ transfected treatments, under resting and both *Therapeutic* and *Preventative* activation profiles. Data are expressed as  $2^{-\Delta Ct}$ , where  $\Delta Ct$  is the mean difference in qPCR cycle threshold numbers of the reference gene between the resting control and treated sample. Results expressed as a box-and-whiskers plot of  $n \geq 3$  biological replicates, with the box spanning the 25<sup>th</sup> to 75<sup>th</sup> percentiles and the whiskers spanning the min and max values. No statistical significance observed between reference genes.

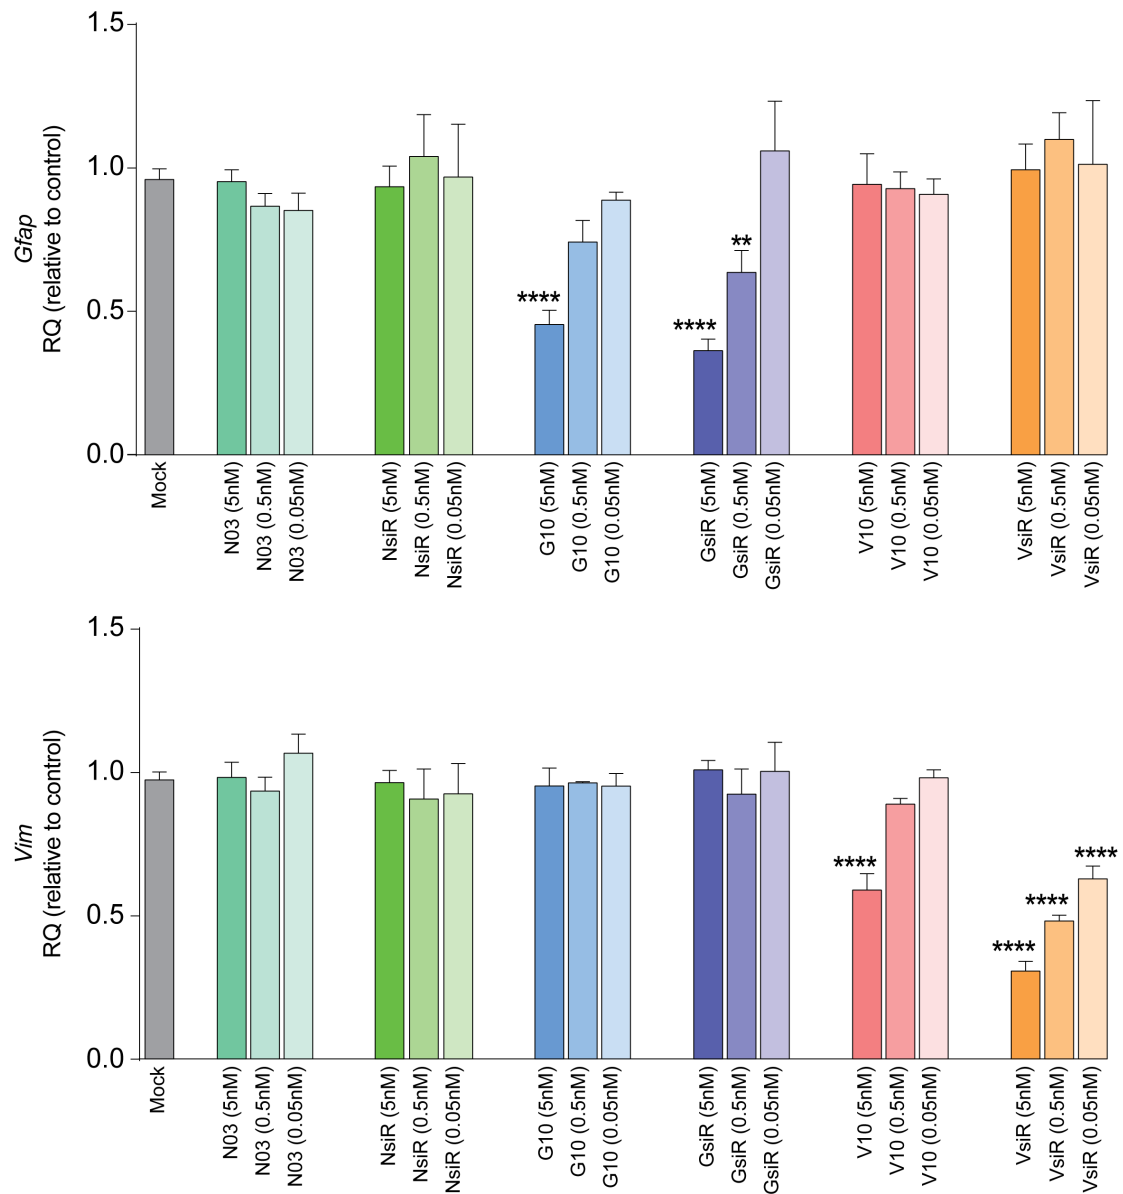

**Figure S5. 3WJs knock down the expression of intermediate filament genes in a dose-responsive manner with efficiencies similar to commercial siRNA pools. (A) *Gfap* and (B) *Vim* mRNA knockdown measured in high-FBS/FGF-free matured astrocytes under resting conditions upon Lipofectamine RNAiMAX-mediated transfection. Non-targeted, anti-*Gfap* and anti-*Vim* 3WJs (N03, G10 and V10, respectively) are compared to analogous siRNA pools (NsiR, GsiR and VsiR, respectively). Results are expressed as the mean mRNA expression (qPCR) of  $\geq 6$  biological replicates  $\pm$  SD; *Gapdh* reference gene; \*  $p \leq 0.05$ , \*\*  $p \leq 0.01$ , \*\*\*  $p \leq 0.001$ , or \*\*\*\*  $p \leq 0.0001$  relative to control samples (one-way ANOVA with Dunnett's multiple comparison test).**

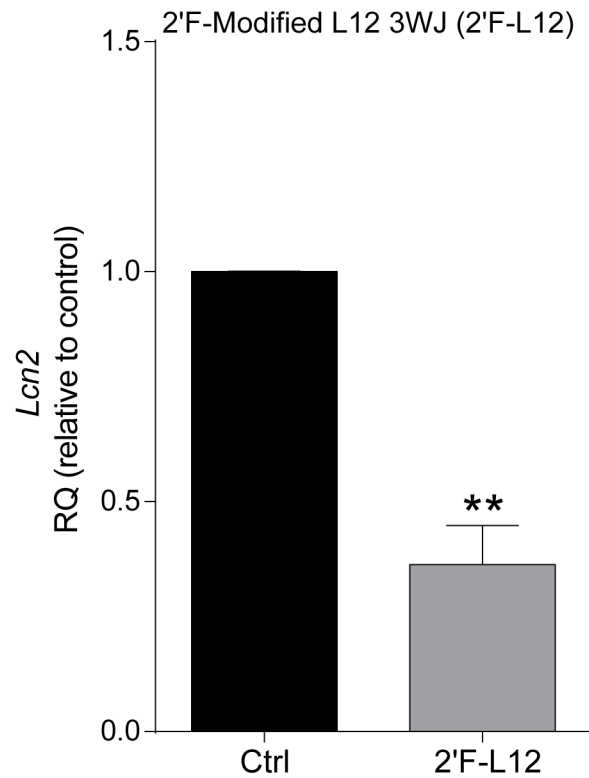

**Figure S6. *In vitro* knockdown of *Lcn2* mRNA by 2'-fluoro modified L12-3WJ.** qPCR data showing significant downregulation of *Lcn2* mRNA by a lipofected 5 nM dose of 2'F-L12-3WJ as compared to non-treated astrocytes. Astrocytes activated with LPS+IFN- $\gamma$  treatment (*Preventative* conditions), mRNA expression measure 48h after transfection. *Gapdh* reference gene. Data expressed as the mean RQ of n= 3 biological replicates  $\pm$  SD; \*\*  $p \leq 0.01$  relative to non-treated samples (unpaired t-test with Welch's correction).

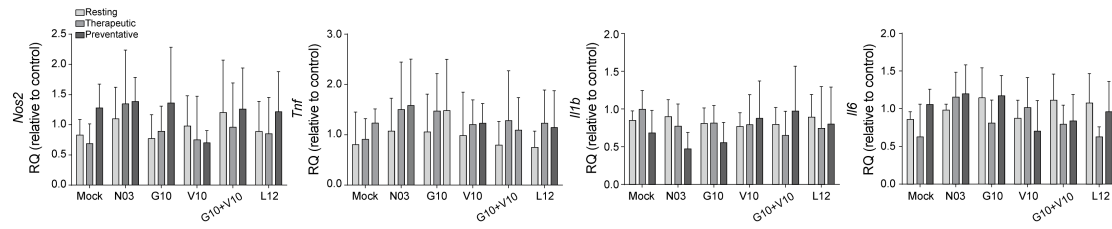

**Figure S7. Neither 3WJ transfection nor knockdown of *Gfap*, *Vim* or *Lcn2* affects the expression of pro-inflammatory markers under resting or activated conditions.** mRNA levels of several pro-inflammatory markers known to be upregulated in reactive low-FBS astrocytes: *Nos2*, *Tnf*, *Il1b* and *Il6*. Results are expressed as the mean mRNA expression (qPCR) of  $n \geq 2$  biological replicates  $\pm$  SD; *Gapdh* reference gene; \*  $p \leq 0.05$ , \*\*  $p \leq 0.01$ , \*\*\*  $p \leq 0.001$ , or \*\*\*\*  $p \leq 0.0001$  relative to control samples of the same activation state (two-way ANOVA with Dunnett's multiple comparison test).



**Table S1. siRNA moieties of pRNA 3WJ nanostructures used in this work.**

| <b>3WJ</b> | <b>Target</b>       | <b>Analogous ON-TARGET siRNA<sup>a</sup></b> | <b>Target (Sense) Sequence</b> |
|------------|---------------------|----------------------------------------------|--------------------------------|
| G10        | <i>Gfap</i> (mouse) | J-043455-10                                  | AGC ACG AAG CUA ACG ACU A      |
| V10        | <i>Vim</i> (mouse)  | J-061596-10                                  | AGG AAG AGA UGG CUC GUC A      |
| L12        | <i>Lcn2</i> (mouse) | J-042638-12                                  | GCG CAG AGA CCC AAU GGU U      |
| N03        | Non-Targeting       | D-001810-03                                  | UGG UUU ACA UGU UUU CUG A      |

<sup>a</sup>Individual siRNA components of the L-043455-01 anti-GFAP, L-061596-01 anti-Vim, L-042638-01 or D-001810-10 non-targeting ON-TARGET SMARTpools, as appropriate.

**Table S2. Primary and secondary antibodies used in in this work.**

| <b>Antibody</b>            | <b>Supplier</b>          | <b>Dilution</b> |
|----------------------------|--------------------------|-----------------|
| Chicken anti-GFAP          | Abcam (ab4674)           | 1:500           |
| Rabbit anti-GFAP           | Dako (Z0334)             | 1:500           |
| Chicken anti-Vimentin      | Abcam (ab73159)          | 1:500           |
| Rat anti-Lipocalin2        | R&D Systems (MAB1857)    | 1:250           |
| Mouse anti-S100B           | BD Bioscience (BD612376) | 1:500           |
| Rabbit anti-Aldh111        | Abcam (AB87117)          | 1:250           |
| Rabbit anti-pSTAT3         | Cell Signaling (9145)    | 1:100           |
|                            |                          |                 |
| AlexaFluor488 anti-chicken | Invitrogen               | 1:1,000         |
| AlexaFluor488 anti-rabbit  | Invitrogen               | 1:1,000         |
| AlexaFluor546 anti-mouse   | Invitrogen               | 1:1,000         |
| AlexaFluor546 anti-rabbit  | Invitrogen               | 1:1,000         |
| AlexaFluor647 anti-rabbit  | Invitrogen               | 1:1,000         |

**Table S3. TaqMan Gene Expression Assay reagents used in this work.**

| <b>Target Gene</b> | <b>TaqMan Assay</b> |
|--------------------|---------------------|
| Gfap               | Mm01253033_m1       |
| Vim                | Mm01333430_m1       |
| Lcn2               | Mm01324470_m1       |
| Nes                | Mm00450205_m1       |
| Il6                | Mm00446190_m1       |
| Tnf                | Mm00443258_m1       |
| Ifnb1              | Mm00439552_s1       |
| Nos2               | Mm00440502_m1       |
| Ciita              | Mm00482914_m1       |
| Il1b               | Mm00434228_m1       |
| Tlr4               | Mm00445273_m1       |
| Ifngr1             | Mm00599890_m1       |
| Ifngr2             | Mm00492626_m1       |
| Gapd               | 4352339E            |
| Actb               | 4319413E            |
| 18s                | 4352341E            |

**Table S4. Primary antibodies used in this work.**

| <b>Antibody</b>                | <b>Supplier</b>       | <b>Dilution</b> |
|--------------------------------|-----------------------|-----------------|
| Rabbit anti-GFAP               | Dako (Z0334)          | 1:10,000        |
| Mouse anti-Vimentin            | Abcam (ab8978)        | 1:500           |
| Rat anti-Lipocalin 2           | R&D Systems (MAB1857) | 1:1,000         |
| Rabbit anti-pSTAT3<br>(Tyr705) | Cell Signaling (9145) | 1:1,000         |
| Mouse anti- $\beta$ -actin     | Sigma (A1978)         | 1:10,000        |
